# Supplementary material for: Correction of technical bias in clinical microarray data improves concordance with known biological information
Source: PubMed Central journal article supplement (PMC2374720; doi:10.1186/gb-2008-9-2-r26), 2008-02-04

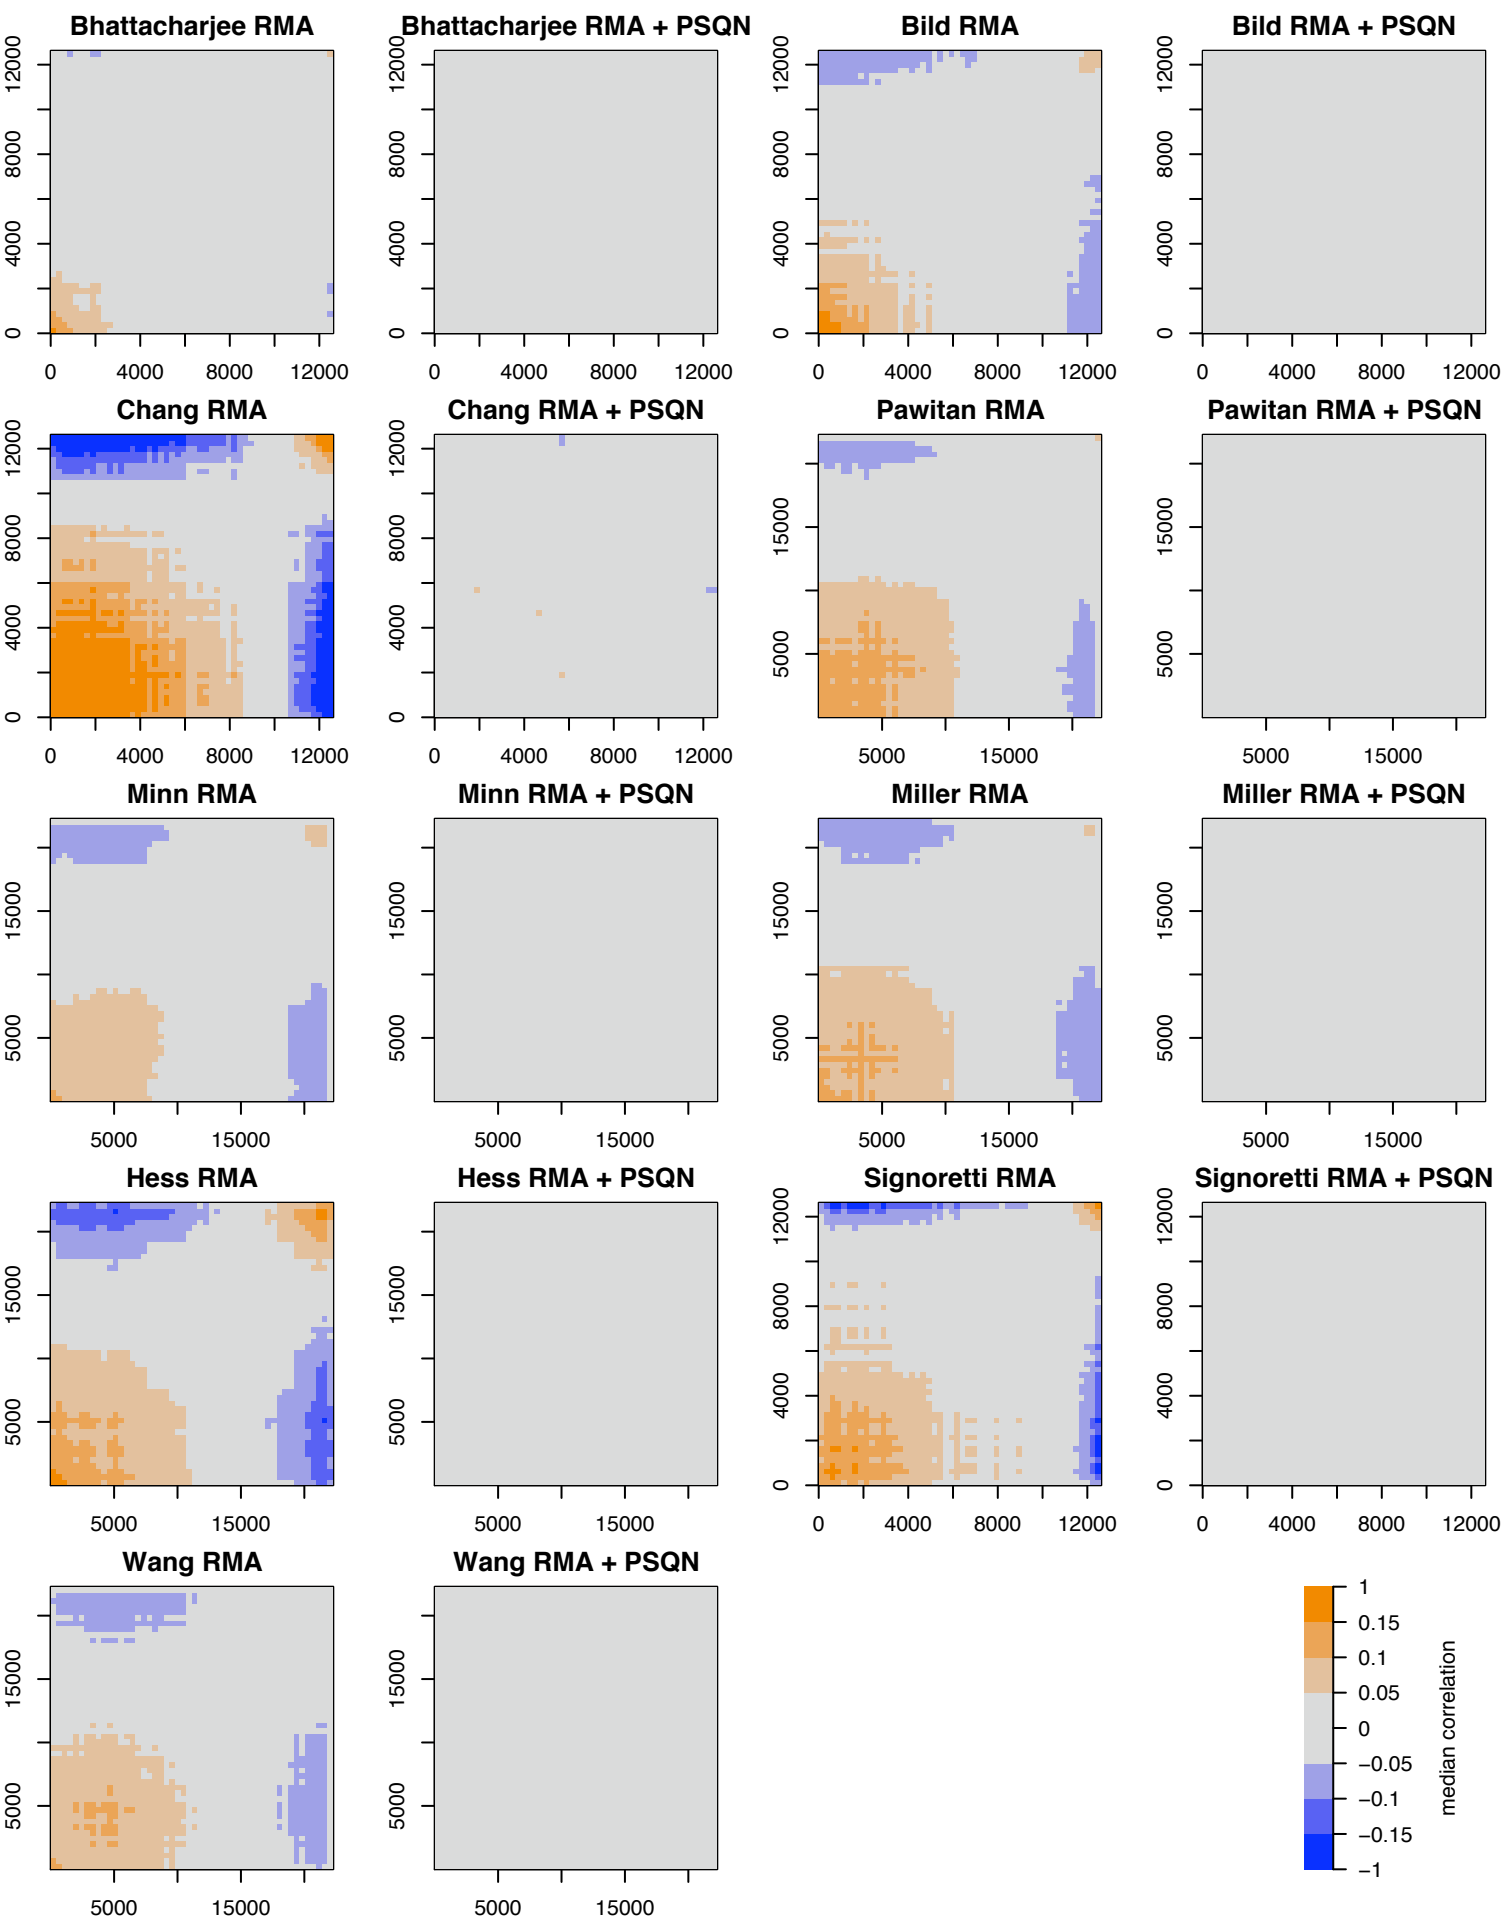

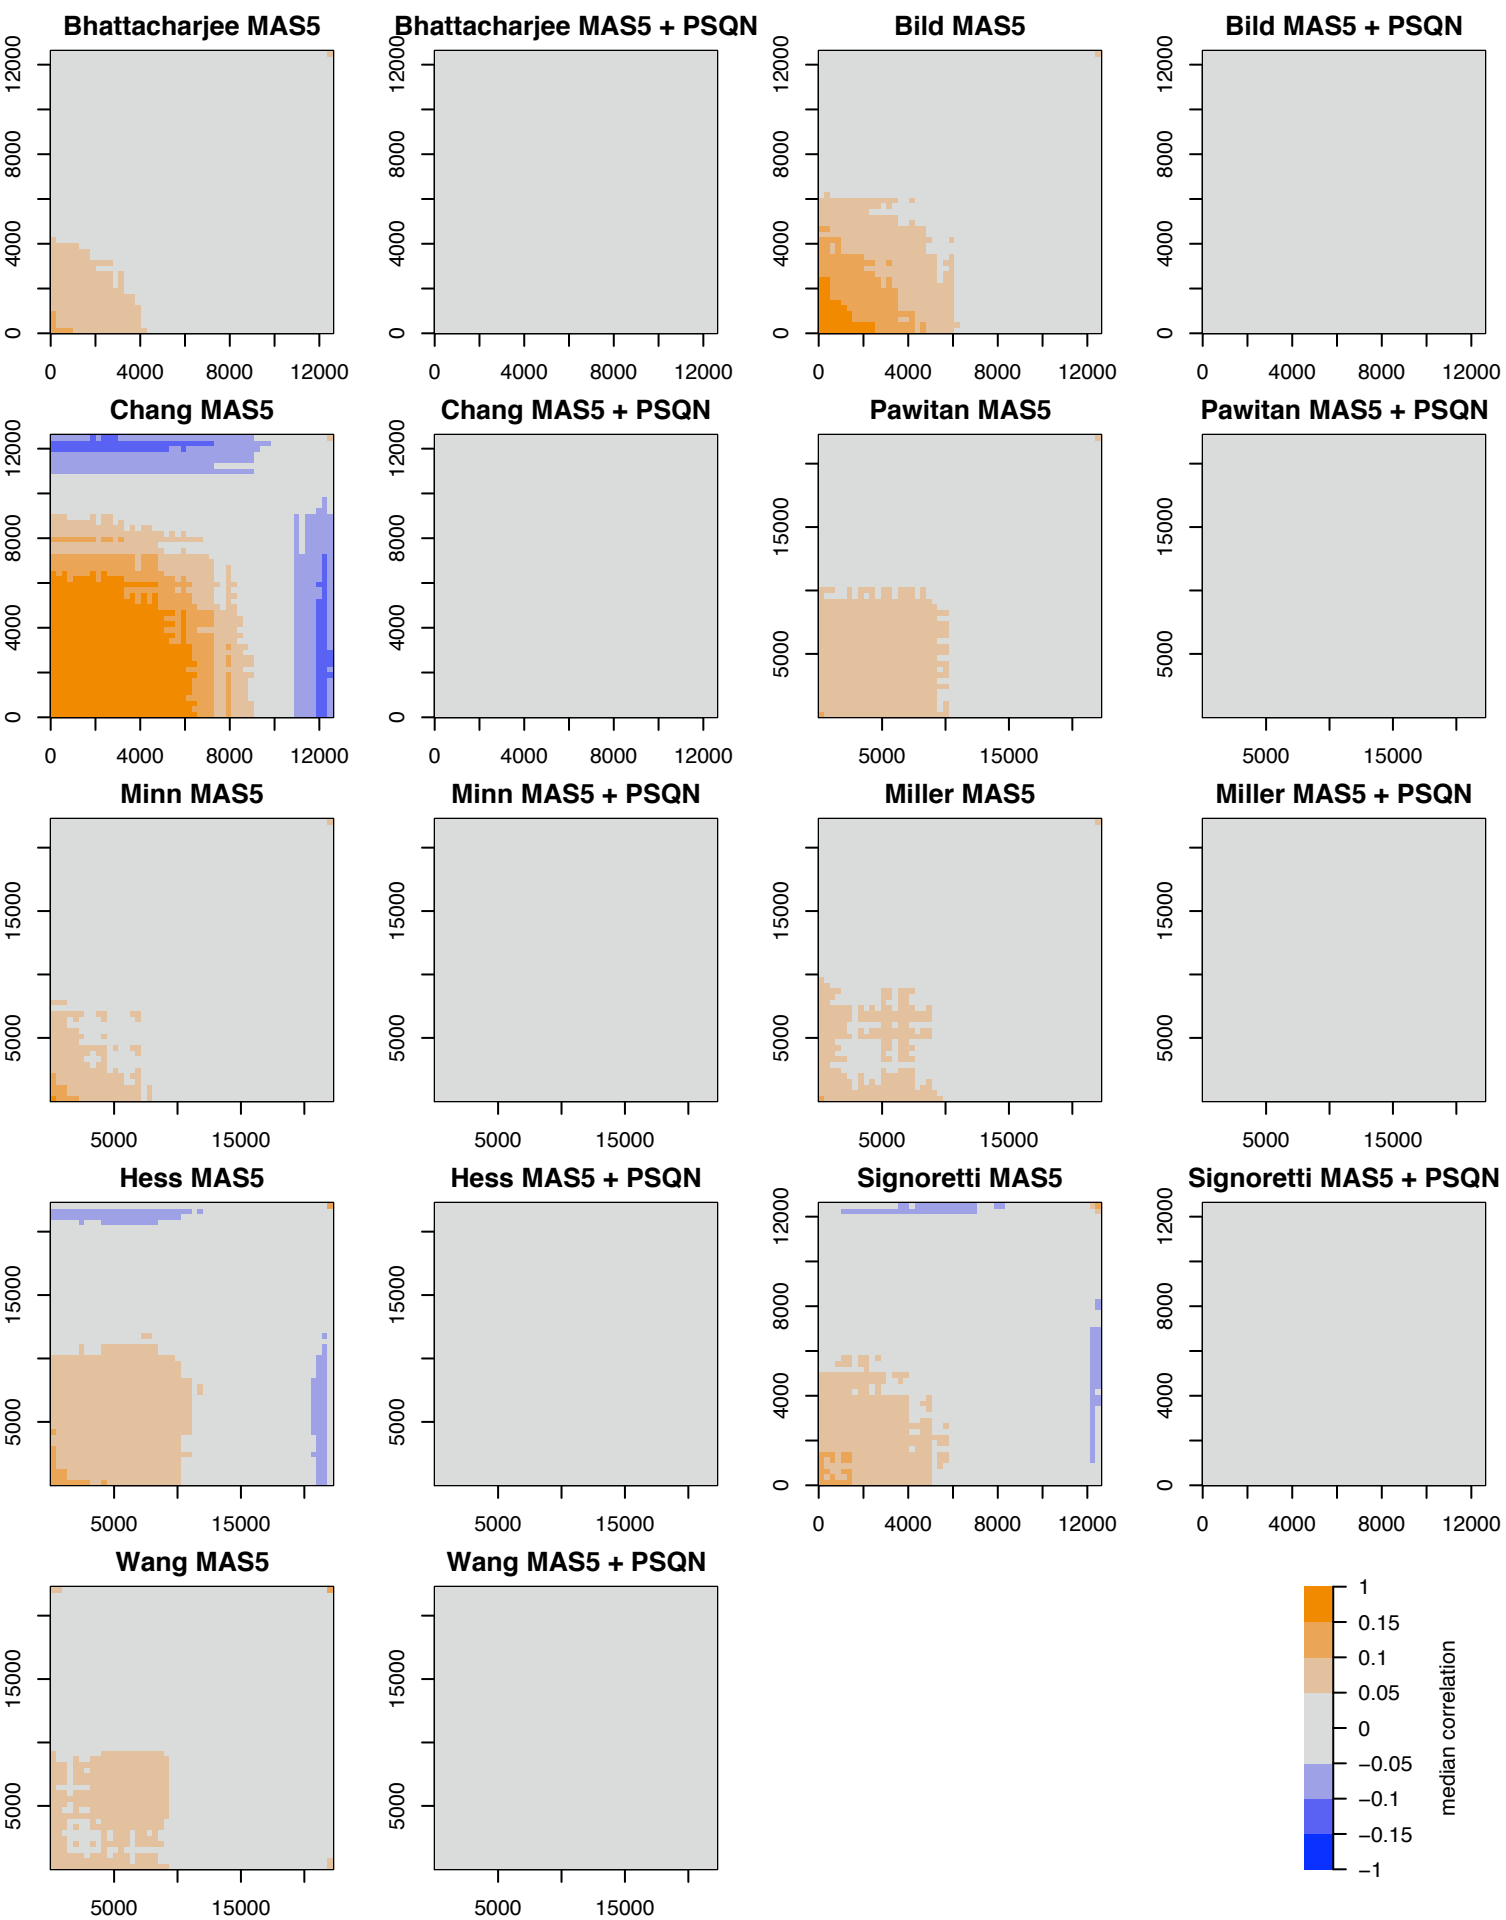

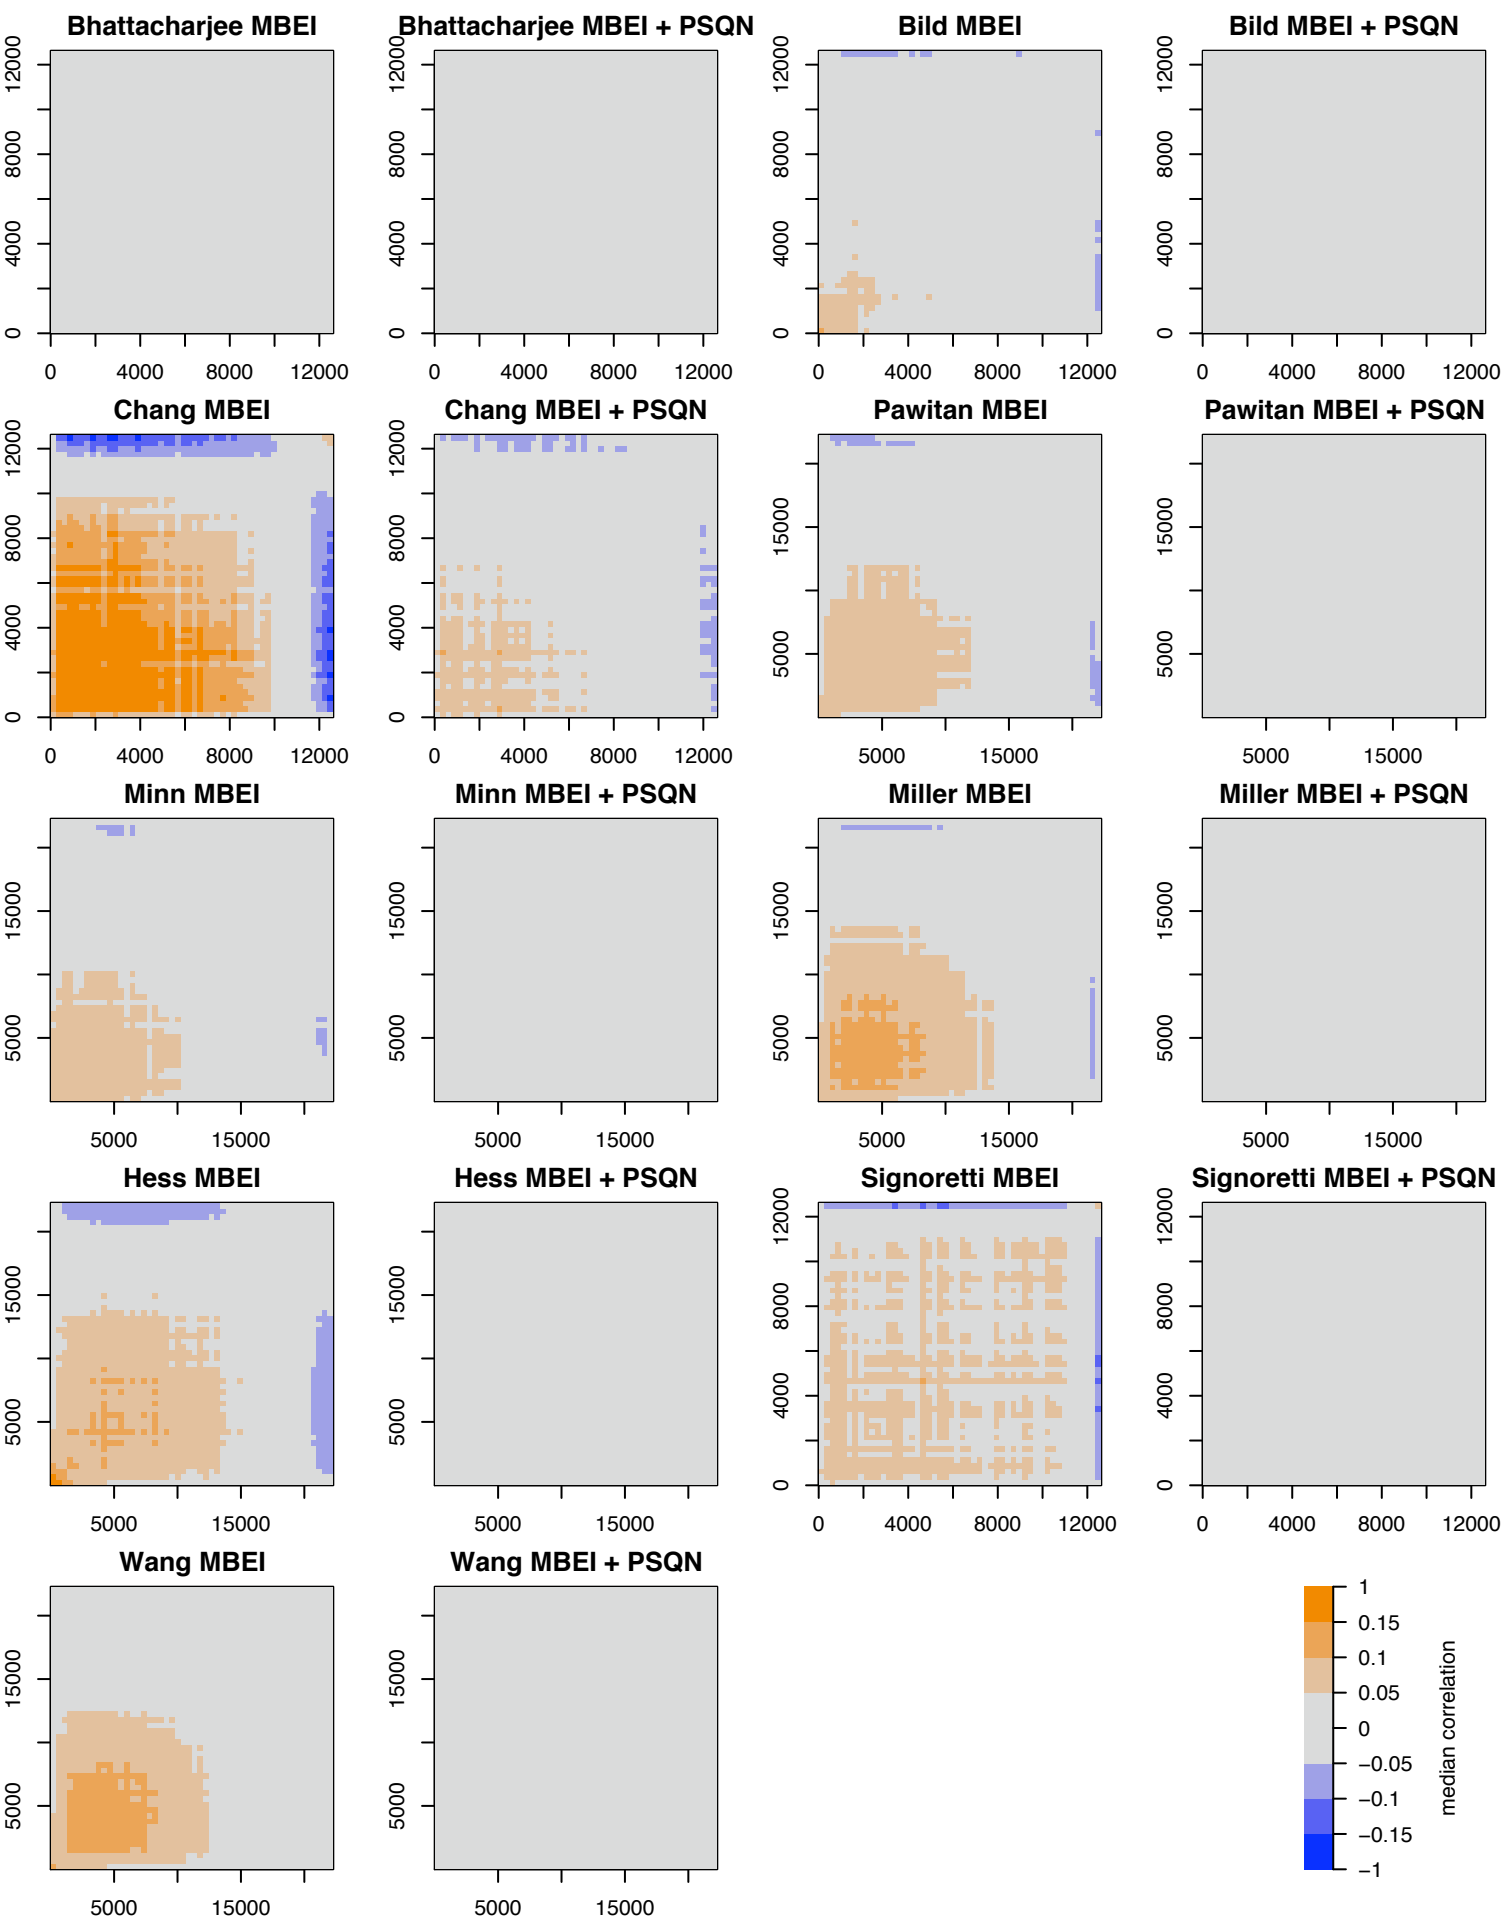

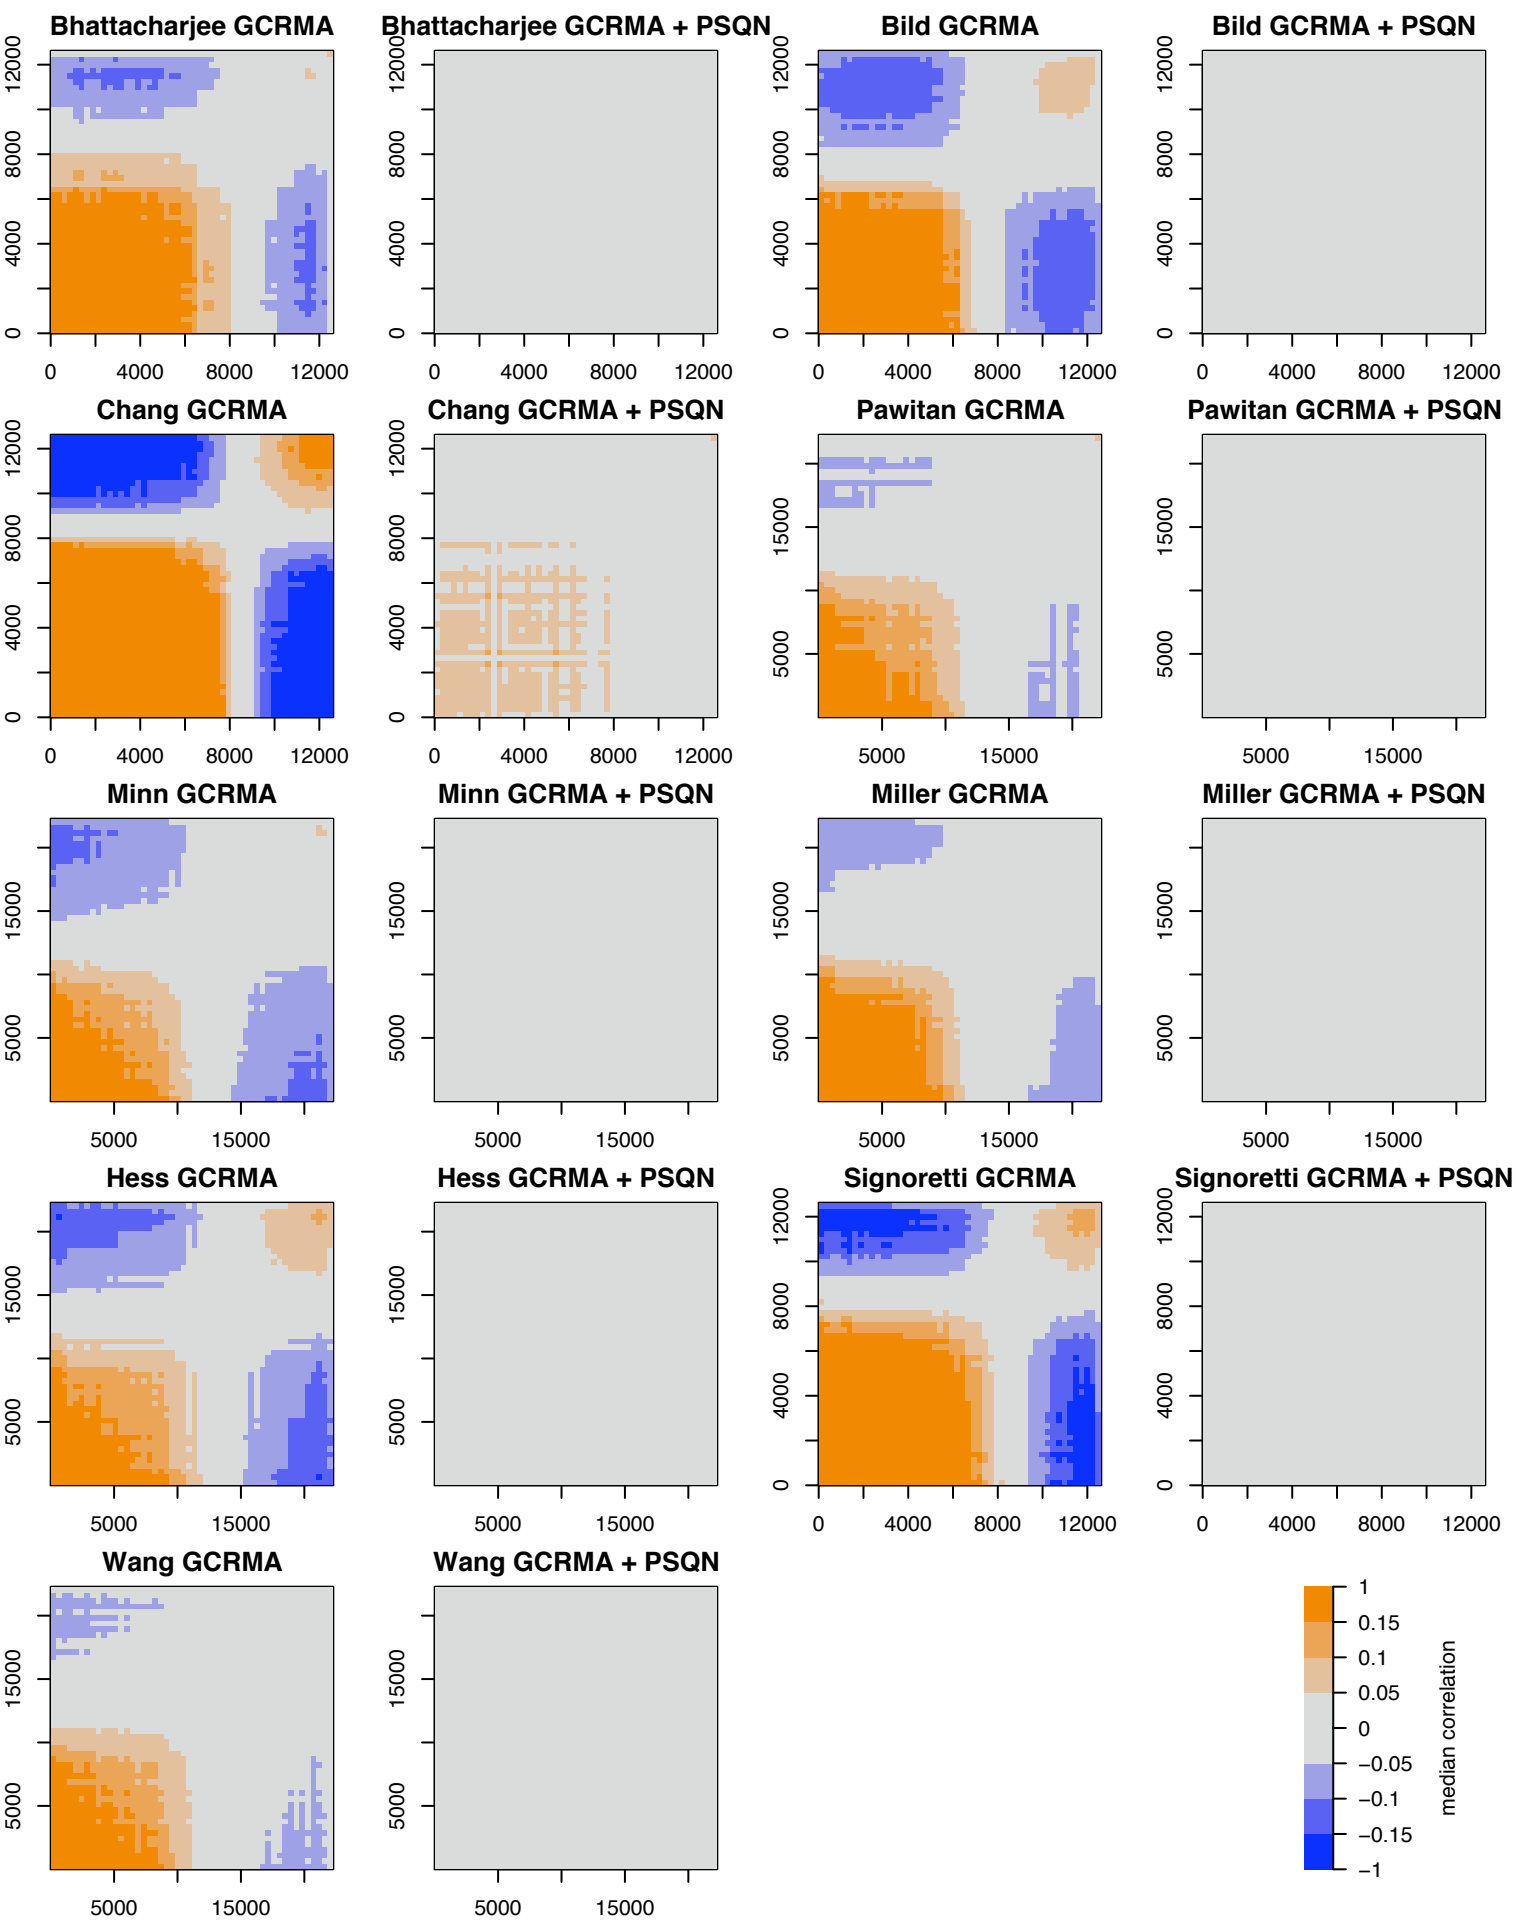

Supplement: gb-2008-9-2-r26-S1.pdf [file gb-2008-9-2-r26-S1.pdf]
